# Supplementary material
Source: PubMed Central journal article supplement (PMC8881958)
Supplement: NIHMS1781054-supplement-Supporting_Information.pdf [file NIHMS1781054-supplement-Supporting_Information.pdf]

Supporting Information

**Photodynamic Activity of Graphene Oxide/Polyaniline/Manganese Oxide Ternary Composites Towards Both Gram-Positive and Gram-Negative Bacteria**

Gustavo Chata,<sup>a</sup> Forrest Nichols,<sup>a</sup> Rene Mercado,<sup>a</sup> Tufa Assafa,<sup>a</sup> Glenn L. Millhauser,<sup>a</sup> Chad Saltikov,<sup>b</sup> Shaowei Chen<sup>a,\*</sup>

<sup>a</sup> Department of Chemistry and Biochemistry, University of California, 1156 High Street, Santa Cruz, California 95064

<sup>b</sup> Department of Microbiology and Environmental Toxicology, University of California, 1156 High Street, Santa Cruz, California 95064

\* E-mail: [shaowei@ucsc.edu](mailto:shaowei@ucsc.edu)

**List of Contents**

- One table
- Nine figures

**Table S1.** Comparison of Mn contents (wt%) in GPM-1 and GPM-2 from XPS and ICP-OES measurements

| <b>Sample</b> | <b>XPS</b> | <b>ICP-OES</b> |
|---------------|------------|----------------|
| GPM-1         | 1.65%      | 1.82%          |
| GPM-2         | 1.53%      | 1.65%          |

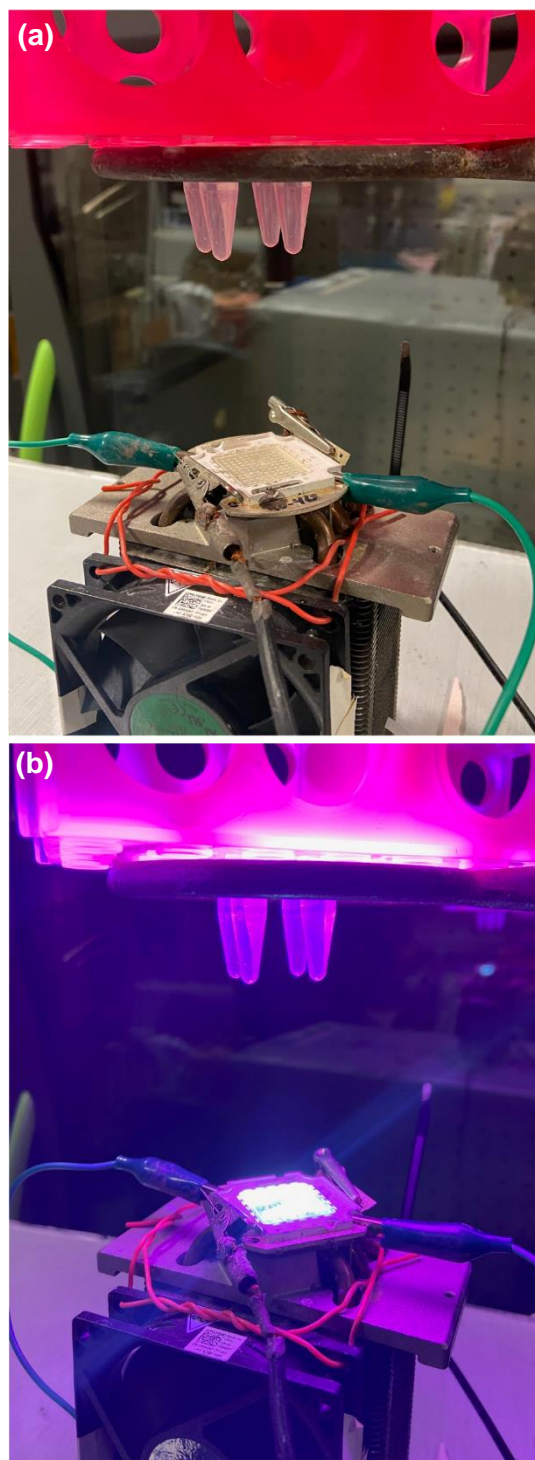

**Figure S1.** Photographs of the apparatus utilized to conduct the photodynamic experiments with the vials containing photocatalysts and respective bacteria (a) before and (b) after turn on of 365 nm photo irradiation.

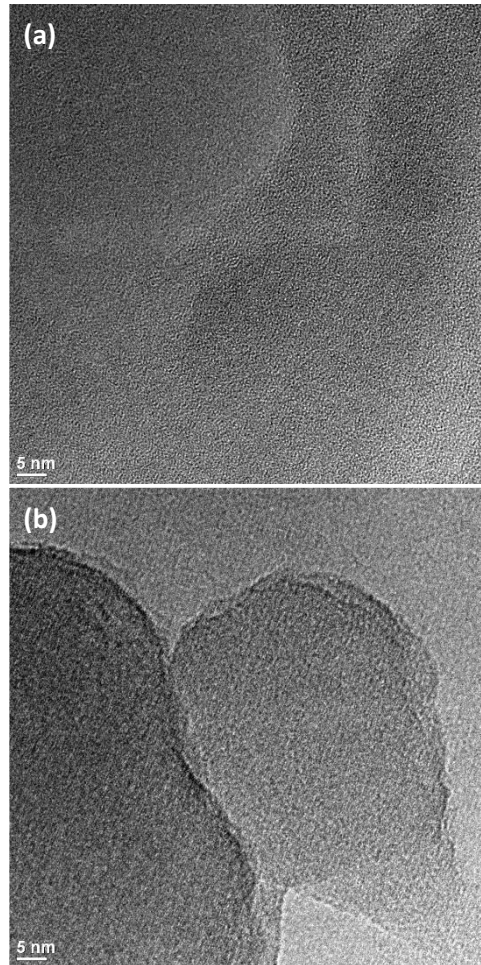

**Figure S2.** High-resolution TEM images of (a) GPM-1 and (b) GPM-2 nanocomposites.

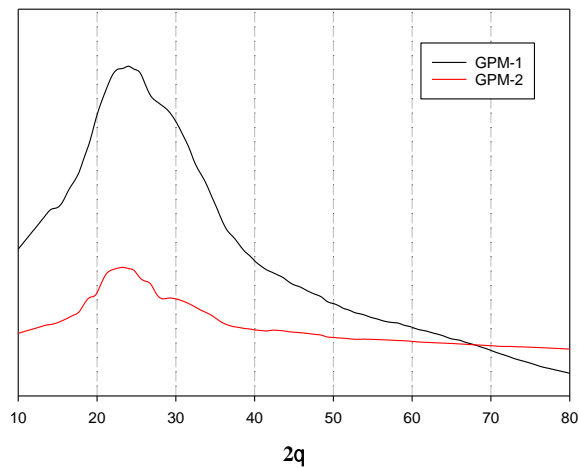

**Figure S3.** XRD patterns of GPM-1 and GPM-2. The broad peak centered at  $2\theta = 23.8^\circ$  likely includes the combined contributions of polyaniline (200) and graphene oxide nanosheets (002) (Y. Zhang, et al., *RSC Adv.* **2017**, *7*, 54031-54038). No diffraction patterns can be resolved for manganese oxides due to the low contents.

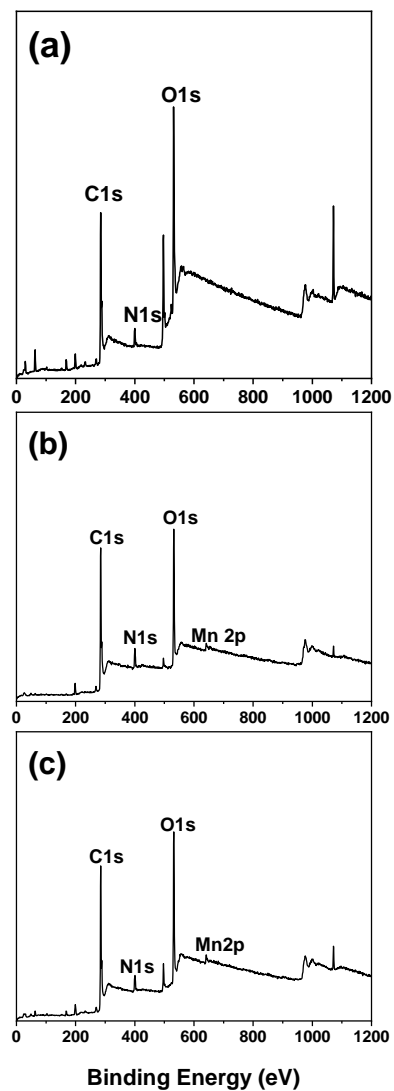

**Figure S4.** XPS survey scan of (a) GP, (b) GPM-1, and (c) GPM-2.

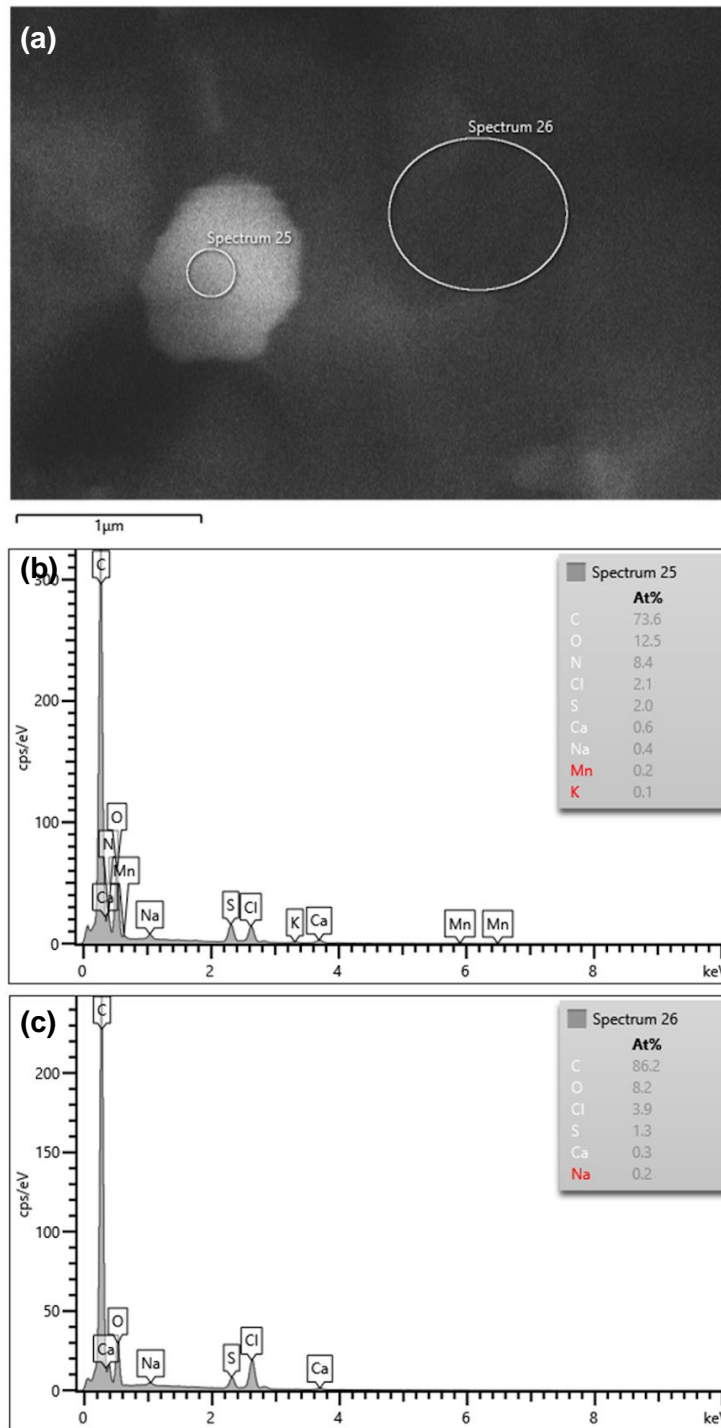

**Figure S5.** (a) SEM Image of the GPM-1 sample with atomic percentage analysis at various positions on the surface of the nanocomposite. The corresponding EDS spectra are shown in panels (b) and (c).

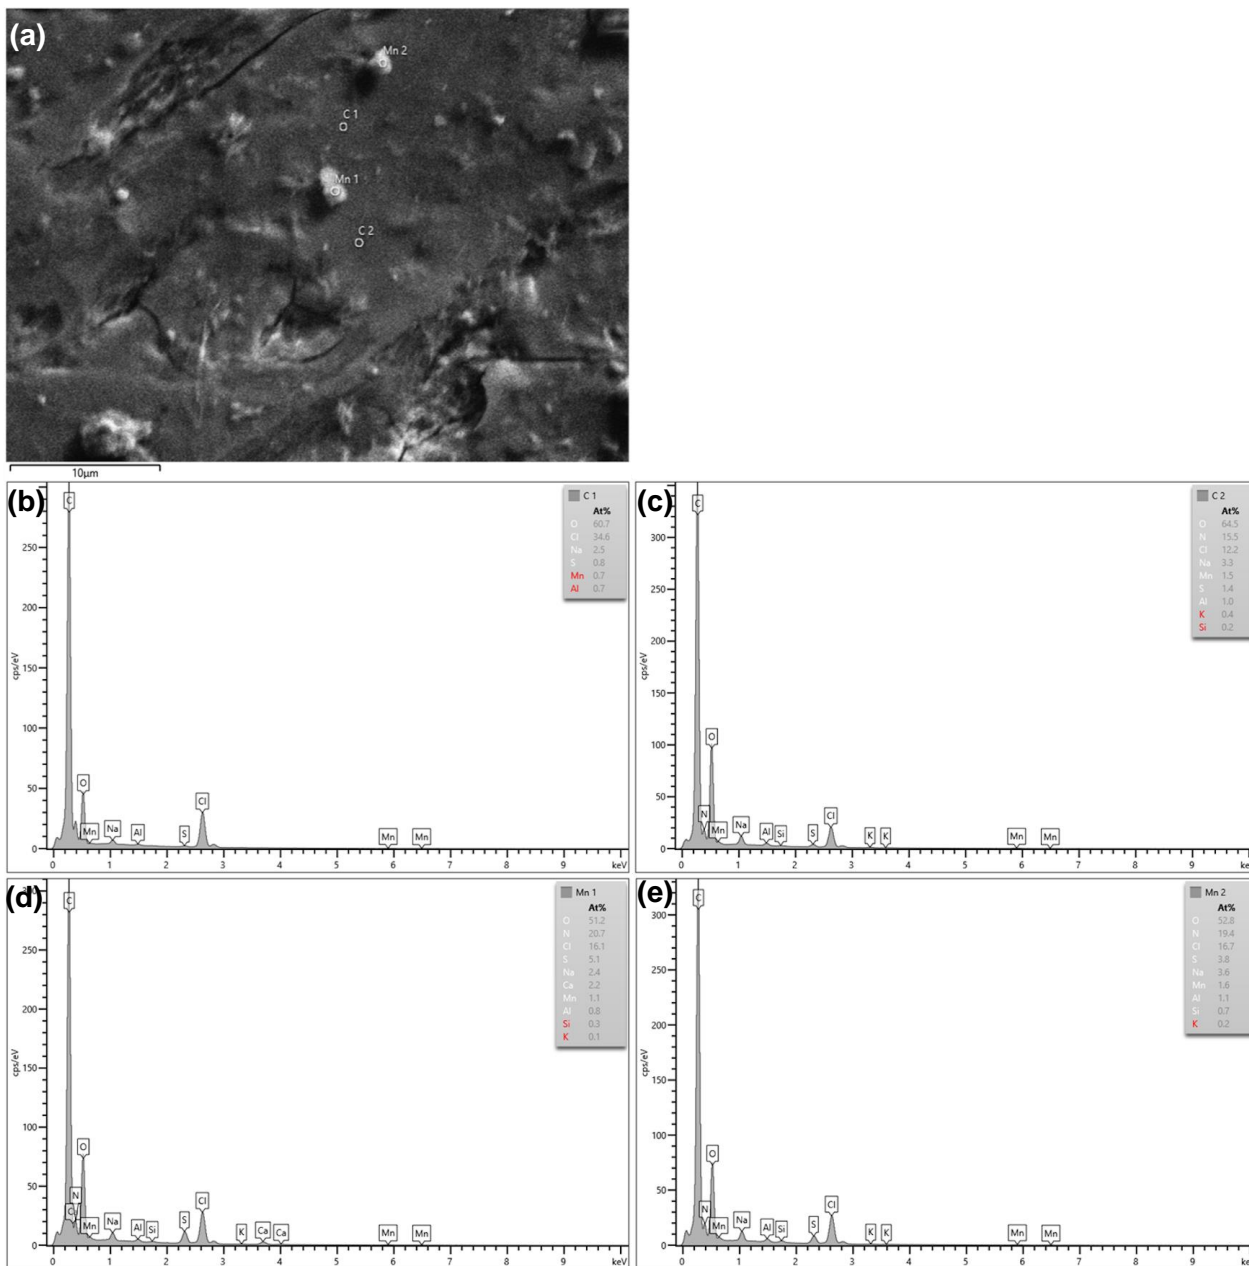

**Figure S6.** (a) SEM Image of the GPM-2 sample with atomic percentage analysis at various positions on the surface of the nanocomposite. The corresponding EDS spectra are shown in panels (b) to (e).

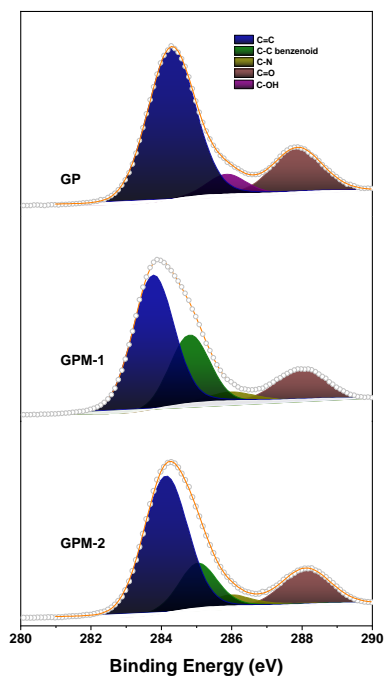

**Figure S7.** High-resolution XPS scans of the C 1s electrons in GP, GPM-1, and GPM-2. Dotted curves are experimental data and shaded peaks are deconvolution fits.



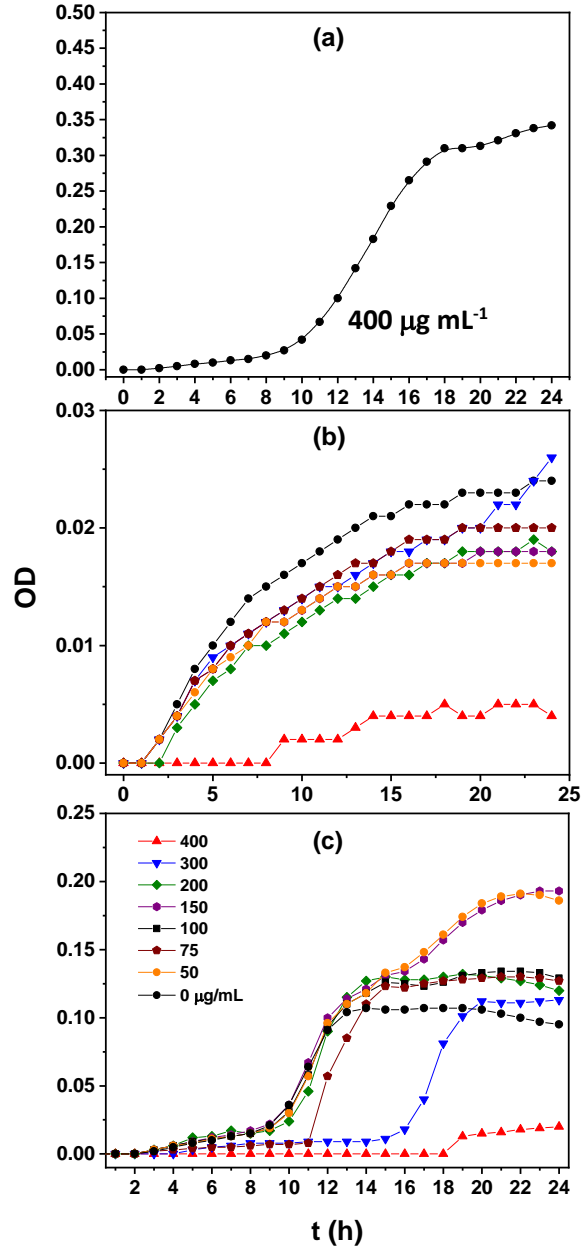

**Figure S8.** Growth curves of *S. epidermidis* in the dark in the presence (a) GP, (b) GPM-1, and (c) GPM-2 at varied concentrations.

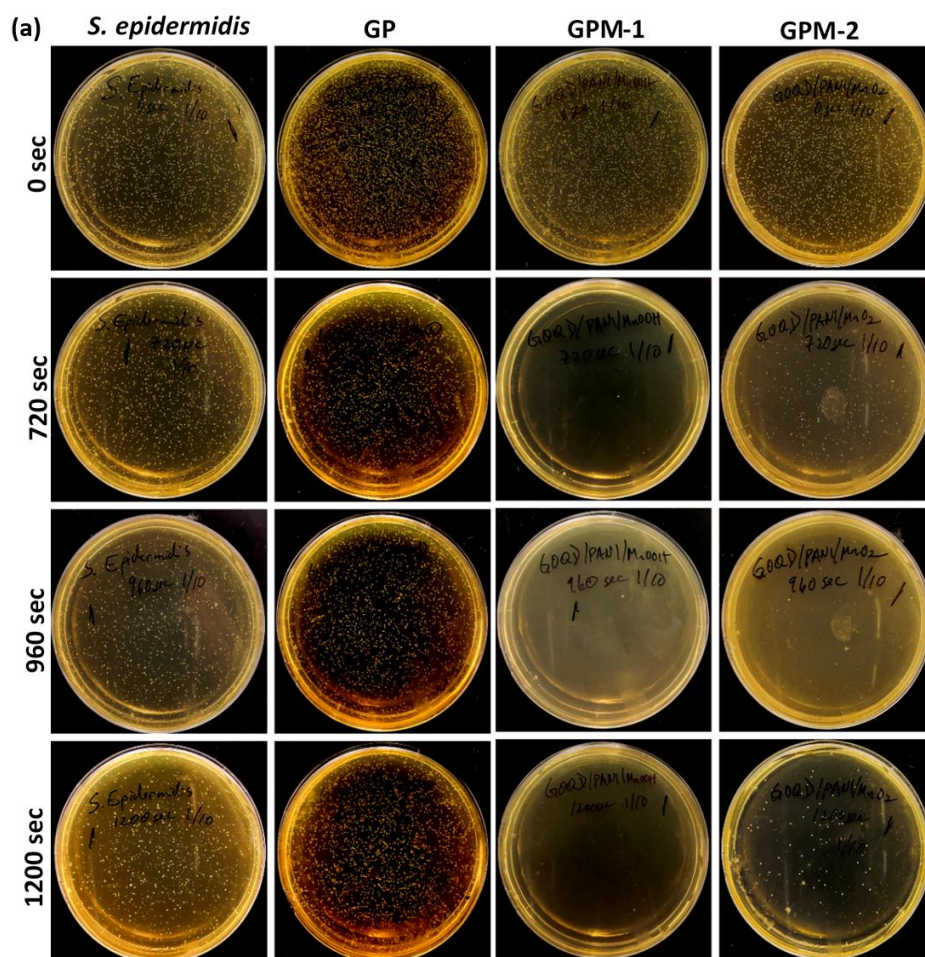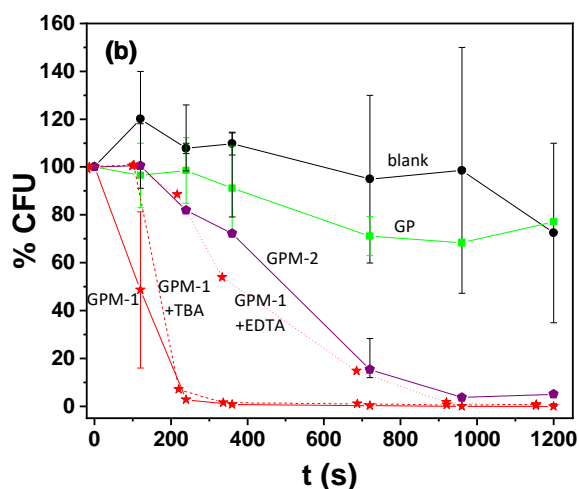

**Figure S9.** (a) Photographs of LB agar plates after incubation with *S. epidermidis* cell suspensions under photoirradiation at 365 nm for varied periods of time in the absence and presence of GP, GPM-1, and GPM-2 at the concentration of 60  $\mu\text{g}/\text{mL}$ . (b) Variation of the normalized bacteria CFU with photoirradiation time from panel (a), and the corresponding plots in the presence of GPM-1 along with TBA (red dashed curve) and EDTA (red dotted curve) scavengers. The error bars reflect the standard deviations of the triplicate measurements.
